# Supplementary material for: A butterfly shaped Eu4(OH)2 cluster-based luminescent metal–organic framework with Lewis basic triazole sites demonstrating turn off sensing in the presence of organic amines
Source: Royal Society of Chemistry journal article supplement (doi:10.1039/d2dt02792e), 2022-11-22
Supplement: d2dt02792e1.pdf [file d2dt02792e1.pdf]

## Supporting Information

### **A butterfly shaped $\text{Eu}_4(\text{OH})_2$ cluster-based luminescent metal-organic framework with lewis basic triazole sites demonstrating turn off sensing to organic amines**

Jie-Ru Wang, Jin Fu, Yu-Juan Zhang, Jia-Chen Liang, Rui-Sha Zhou,\* Si-Min Gong, Jiang-Feng Song\*

Department of Chemistry, North University of China, Taiyuan, Shanxi, 030051, P.R. China

\* Corresponding author.

rszhou0713@nuc.edu.cn (R.S. Zhou), jfsong0129@nuc.edu.cn (J. F. Song)

**Figure captions:**

**Fig. S1** The 3D filling diagram of compound **1** with isosceles triangular channels, and all uncoordinated triazole units are omitted for clarity.

**Fig. S2** N<sub>2</sub> adsorption–desorption isotherms of compound **1**.

**Fig. S3** Three sides of isosceles triangular channels, (a) and (b) both constructed by -(Eu<sub>4</sub>(OH)<sub>2</sub>-ox)<sub>n</sub>- chains and taip<sub>1</sub><sup>2-</sup> anions. (c) constructed by -(Eu<sub>4</sub>(OH)<sub>2</sub>-ox)<sub>n</sub>- chain and taip<sub>2</sub><sup>2-</sup> anions.

**Fig. S4** Two kinds of parallelograms constructed by isosceles triangular channels in compound **1**.

**Fig. S5** Experimental and simulated PXRD diagrams of compound **1**.

**Fig. S6** Infrared spectra of compound **1** and H<sub>2</sub>taip.

**Fig. S7** Thermogravimetric curve of compound **1**.

**Fig. S8** The emission spectra of H<sub>2</sub>taip in the solid state.

**Fig. S9** The photoluminescence spectra of **1**-ethanol emulsion with incremental addition of EDA (0.01 M).

**Fig. S10** The photoluminescence spectra of **1**-ethanol emulsion with incremental addition of DEA (0.01 M).

**Fig. S11** The photoluminescence spectra of **1**-ethanol emulsion with incremental addition of TMA (0.01 M).

**Fig. S12** The photoluminescence spectra of **1**-ethanol emulsion with incremental addition of TEA (0.01 M).

**Fig. S13** Stern-Volmer plot for the luminescence intensity of **1**-ethanol emulsion upon the addition of EDA solution.

**Fig. S14** Stern-Volmer plot for the luminescence intensity of **1**-ethanol emulsion upon the addition of DEA solution.

**Fig. S15** Stern-Volmer plot for the luminescence intensity of **1**-ethanol emulsion upon the addition of TMA solution.

**Fig. S16** Stern-Volmer plot for the luminescence intensity of **1**-ethanol emulsion upon the addition of TEA solution.

**Fig. S17** The fitting curve of the luminescence intensity of **1** at different EDA concentration.

**Fig. S18** The fitting curve of the luminescence intensity of **1** at different DEA concentration.

**Fig. S19** The fitting curve of the luminescence intensity of **1** at different TMA concentration.

**Fig. S20** The fitting curve of the luminescence intensity of **1** at different TEA concentration.

**Fig. S21** The fitting curve of the luminescence intensity of **1** at different aniline concentration.

**Fig. S22** The luminescence intensity of compound **1** after five cycles (a) for aniline, (b) for EDA, (c) for DEA, (d) for TMA, and (e) for TEA.

**Fig. S23** PXRD patterns of compound **1** after five cycles.

**Fig. S24** PXRD patterns of **1** after soaking in organic amines with concentration of 0.1 M for 24 hours.

**Fig. S25** UV absorption spectra of different organic amines and excited spectrum of compound **1**.

**Fig. S26** The absorption spectra of organic amine ethanol solution and emission spectrum of compound **1**.

**Fig. S27** The fluorescence spectra of H<sub>2</sub>taip in ethanol and organic amines.

**Fig. S28** IR spectra of organic amines, compound **1** and compound **1** after sensing organic amines.

**Fig. S29** Luminescence decay curves of compound **1** (a) in EtOH, (b) in EDA, (c) in DEA, (d) in TMA, (e) in TEA, and (f) in aniline.

**Table S1** Selected bond lengths (Å) and angles (°) for **1**.

**Table S2** The three-dimensional dimensions of TEA, aniline, TMA, DEA and EDA.

**Table S3** HOMO and LUMO energy levels of H<sub>2</sub>taip and organic amines.

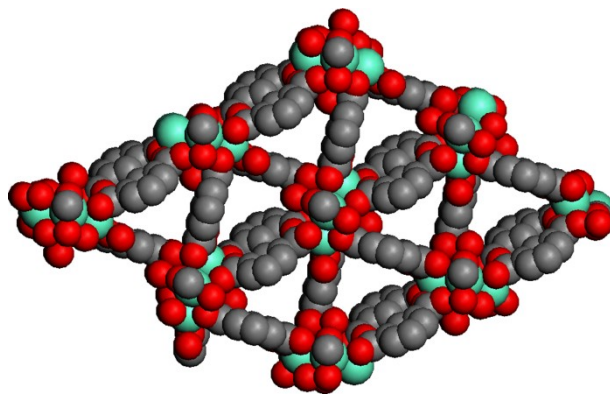

**Fig. S1** The 3D filling diagram of compound **1** with isosceles triangular channels, and all uncoordinated triazole units are omitted for clarity.

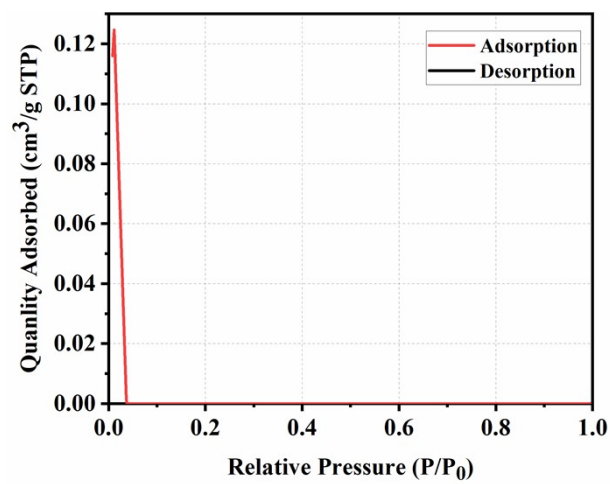

**Fig. S2** N<sub>2</sub> adsorption–desorption isotherms of compound **1**.

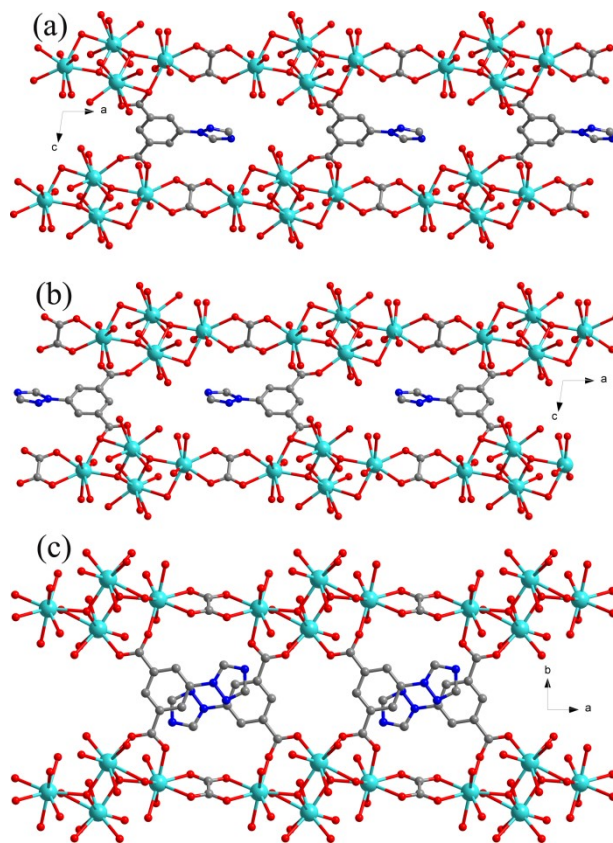

**Fig. S3** Three sides of isosceles triangular channels, (a) and (b) both constructed by  $(\text{Eu}_4(\text{OH})_2\text{-ox})_n^-$  chains and  $\text{taip}_1^{2-}$  anions. (c) constructed by  $(\text{Eu}_4(\text{OH})_2\text{-ox})_n^-$  chain and  $\text{taip}_2^{2-}$  anions.

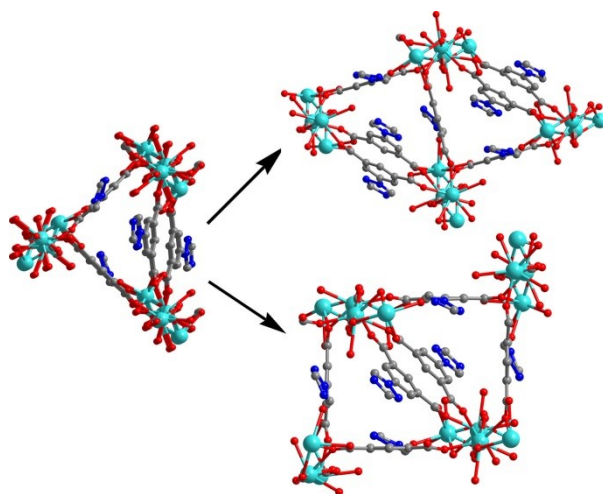

**Fig. S4** Two kinds of parallelograms constructed by isosceles triangular channels in compound **1**.

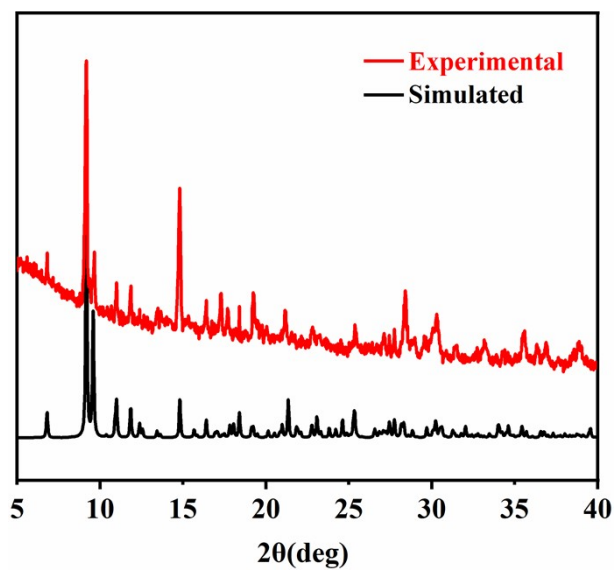

**Fig. S5** Experimental and simulated PXRD diagrams of compound **1**.



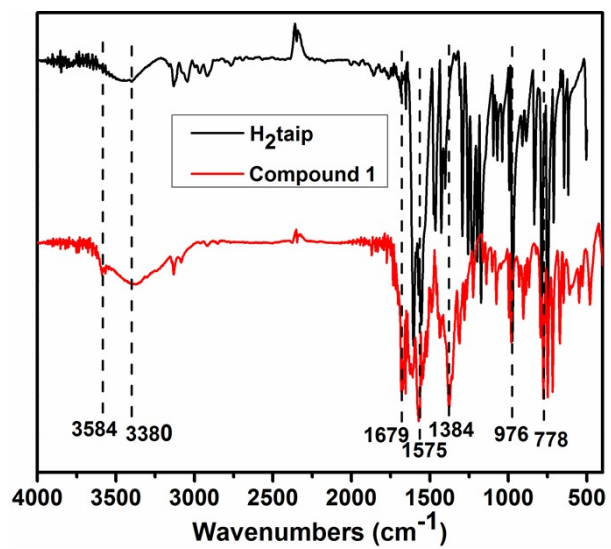

**Fig. S6** Infrared spectra of compound 1 and H<sub>2</sub>taip.

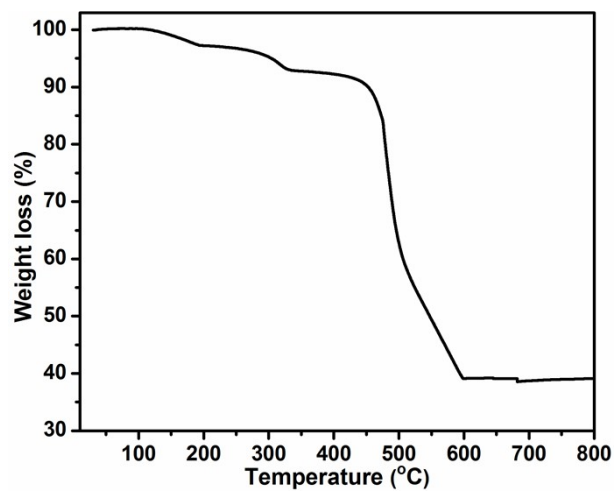

**Fig. S7** Thermogravimetric curve of compound **1**.

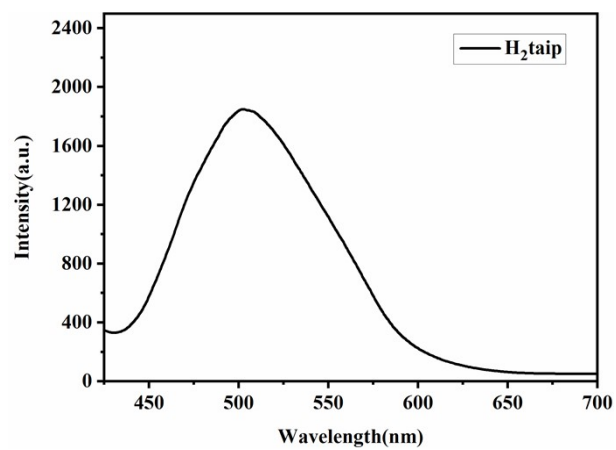

**Fig. S8** The emission spectra of H<sub>2</sub>taip in the solid state.

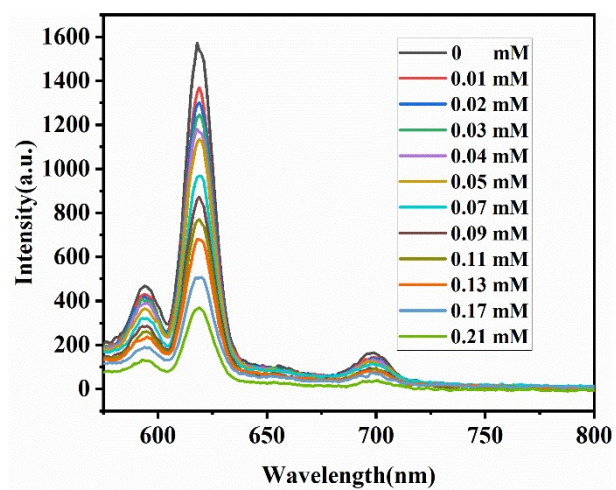

**Fig. S9** The photoluminescence spectra of 1-ethanol emulsion with incremental addition of EDA (0.01 M).

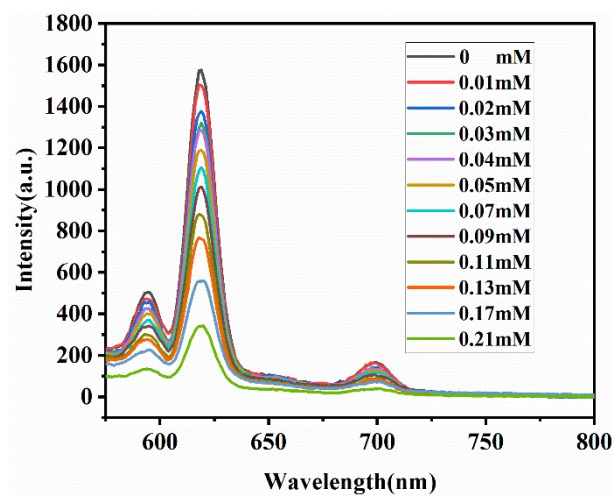

**Fig. S10** The photoluminescence spectra of 1-ethanol emulsion with incremental addition of DEA (0.01 M).

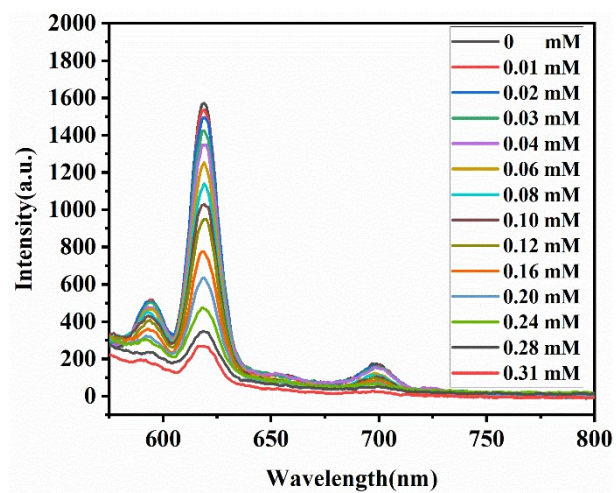

**Fig. S11** The photoluminescence spectra of 1-ethanol emulsion with incremental addition of TMA (0.01 M).

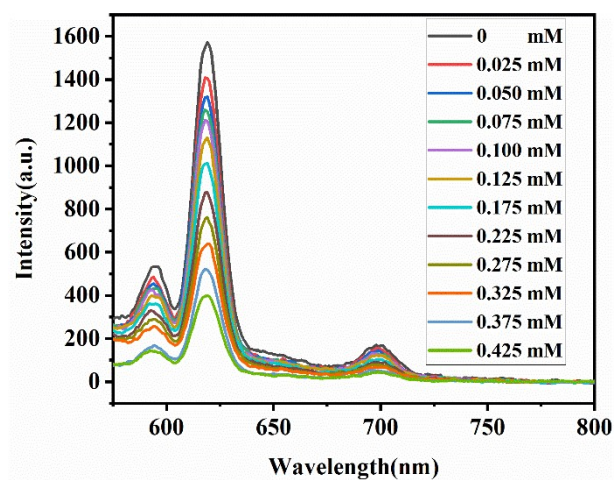

**Fig. S12** The photoluminescence spectra of 1-ethanol emulsion with incremental addition of TEA (0.01 M).

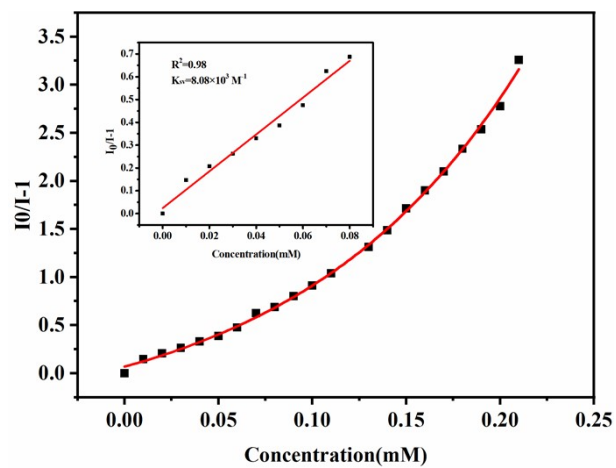

**Fig. S13** Stern-Volmer plot for the luminescence intensity of 1-ethanol emulsion upon the addition of EDA solution.



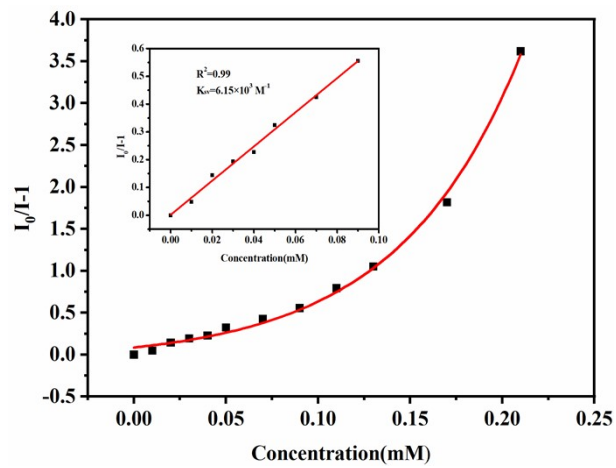

**Fig. S14** Stern-Volmer plot for the luminescence intensity of **1**-ethanol emulsion upon the addition of DEA solution.

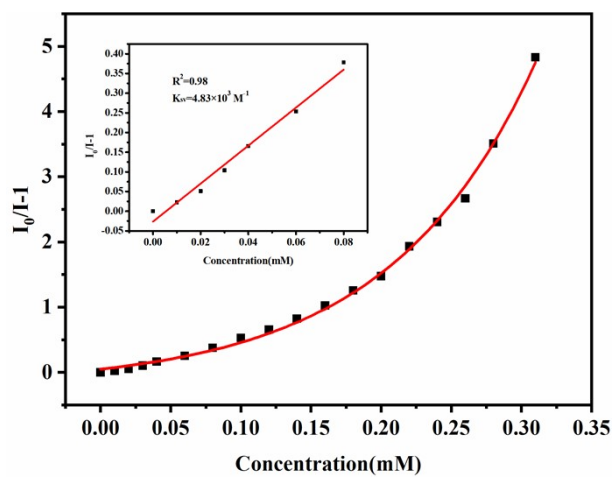

**Fig. S15** Stern-Volmer plot for the luminescence intensity of **1**-ethanol emulsion upon the addition of TMA solution.

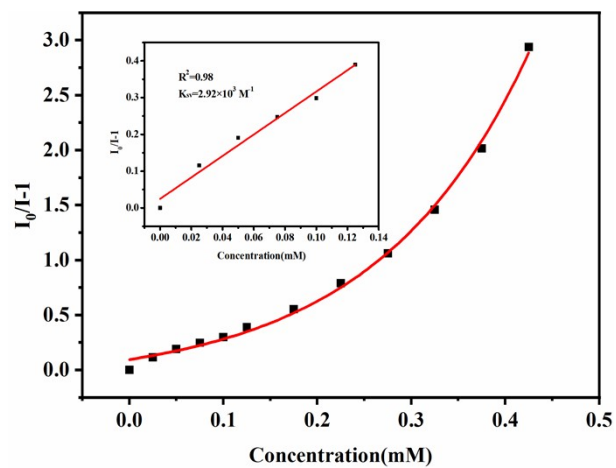

**Fig. S16** Stern-Volmer plot for the luminescence intensity of 1-ethanol emulsion upon the addition of TEA solution.

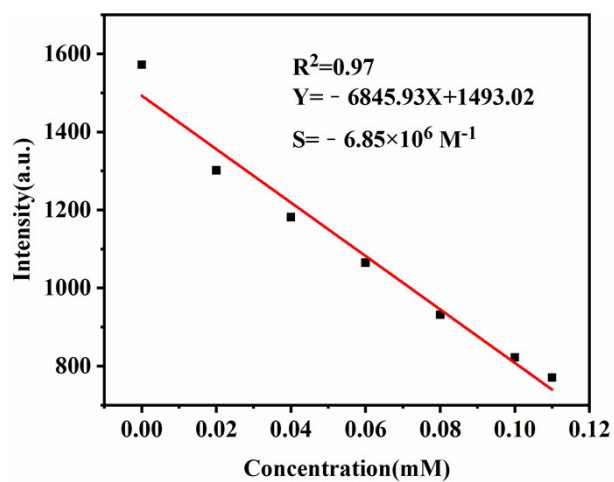

Linear Equation:  $Y=-6845.93X+1493.02$   $R^2=0.97$

Slope= $-6.85\times 10^6 M^{-1}$

Limit detection:  $3\delta/\text{Slope}=4.29\times 10^{-7} M$ ;  $\delta=0.98(N=10)$

**Fig. S17** The fitting curve of the luminescence intensity of **1** at different EDA concentration.

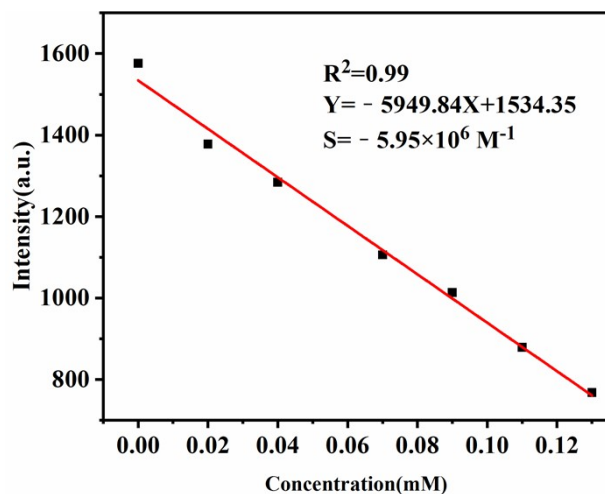

Linear Equation:  $Y = -5949.84X + 1534.35$   $R^2 = 0.99$

Slope =  $-5.95 \times 10^6 \text{ M}^{-1}$

Limit detection:  $3\delta/\text{Slope} = 4.94 \times 10^{-7} \text{ M}$ ;  $\delta = 0.98 (N=10)$

**Fig. S18** The fitting curve of the luminescence intensity of **1** at different DEA concentration.

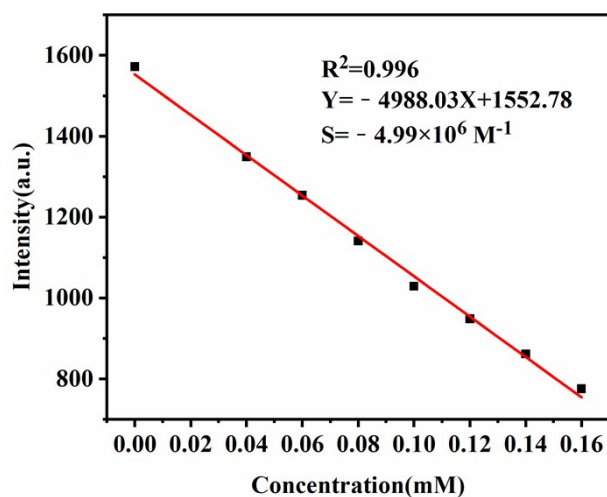

Linear Equation:  $Y=-4988.03X+1552.78$   $R^2=0.996$

Slope= $-4.99 \times 10^6 \text{ M}^{-1}$

Limit detection:  $3\delta/\text{Slope}=5.89 \times 10^{-7} \text{ M}$ ;  $\delta=0.98(N=10)$

**Fig. S19** The fitting curve of the luminescence intensity of **1** at different TMA concentration.

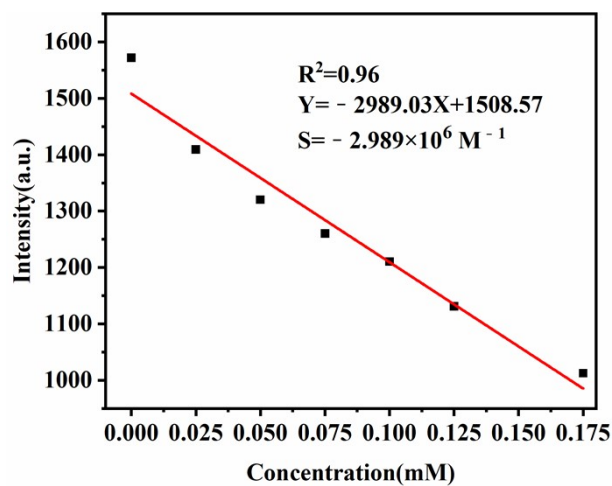

Linear Equation:  $Y=-2989.03X+1508.57$   $R^2=0.96$

Slope= $-2.989 \times 10^6 \text{ M}^{-1}$

Limit detection:  $3\delta/\text{Slope}=9.84 \times 10^{-7} \text{ M}$ ;  $\delta=0.98(N=10)$

**Fig. S20** The fitting curve of the luminescence intensity of **1** at different TEA concentration.

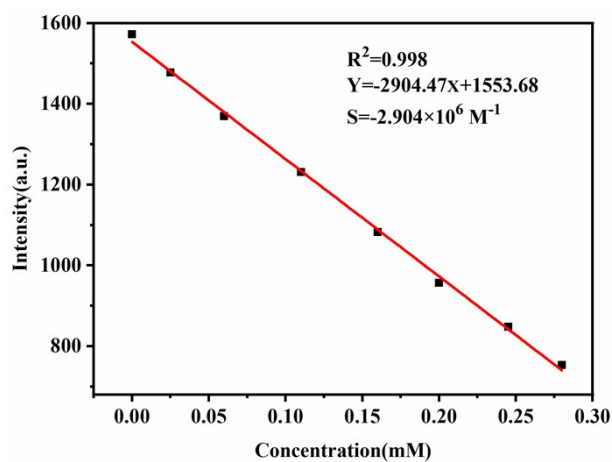

Linear Equation:  $Y=-2904.47X+1553.68$   $R^2=0.998$

Slope= $-2.904 \times 10^6 \text{ M}^{-1}$

Limit detection:  $3\delta/\text{Slope}=1.012 \times 10^{-6} \text{ M}$ ;  $\delta=0.98(N=10)$

**Fig. S21** The fitting curve of the luminescence intensity of **1** at different aniline concentration.



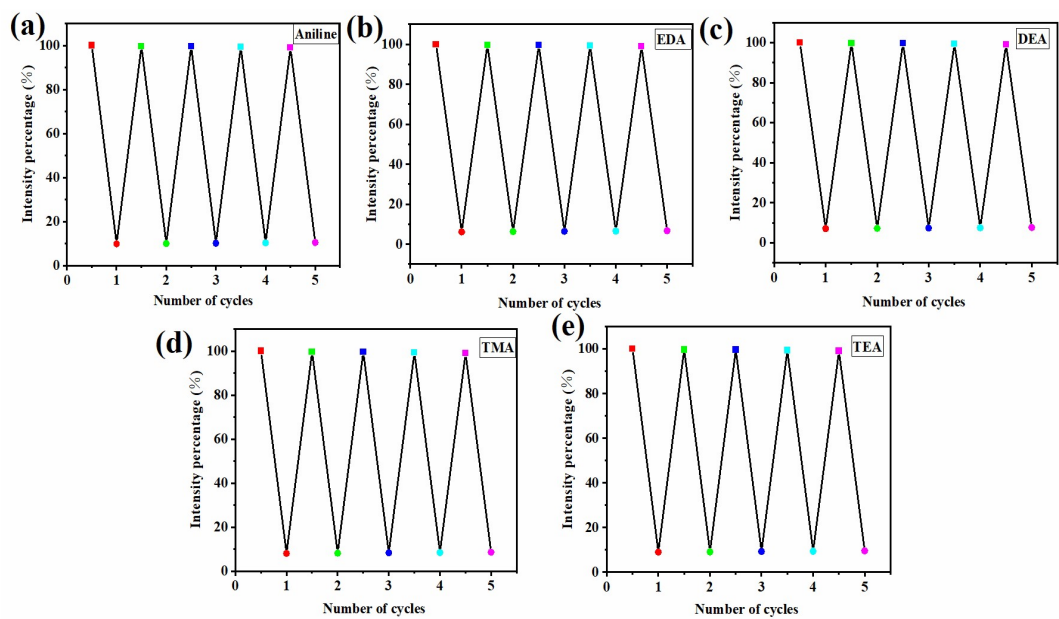

**Fig. S22** The luminescence intensity of compound 1 after five cycles (a) for aniline, (b) for EDA, (c) for DEA, (d) for TMA, and (e) for TEA.

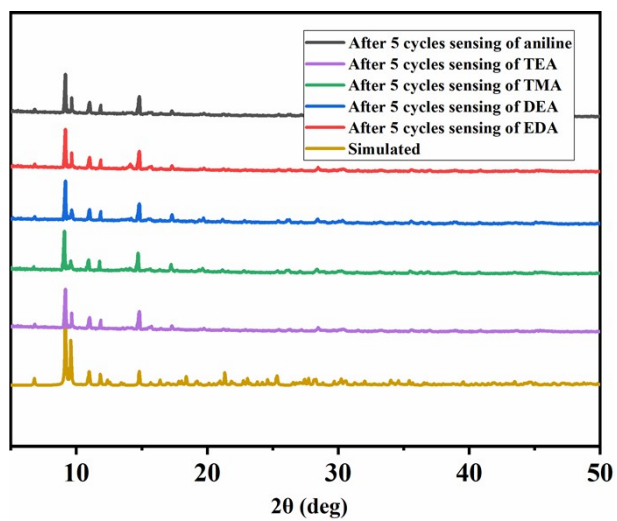

**Fig. S23** PXRD patterns of compound **1** after five cycles.

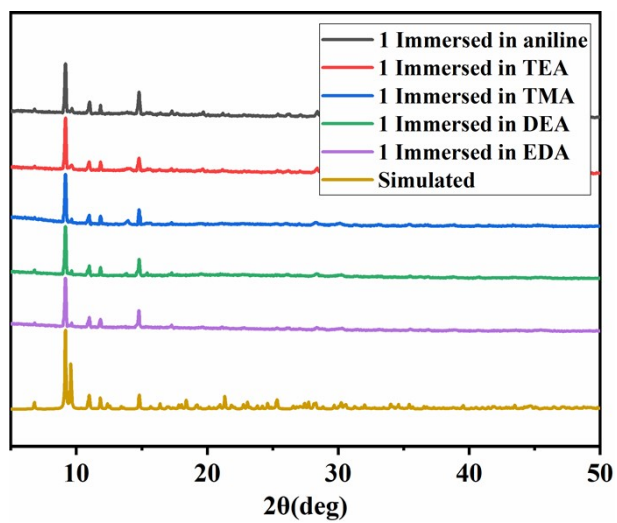

**Fig. S24** PXR D patterns of **1** after soaking in organic amines with concentration of 0.1 M for 24 hours.

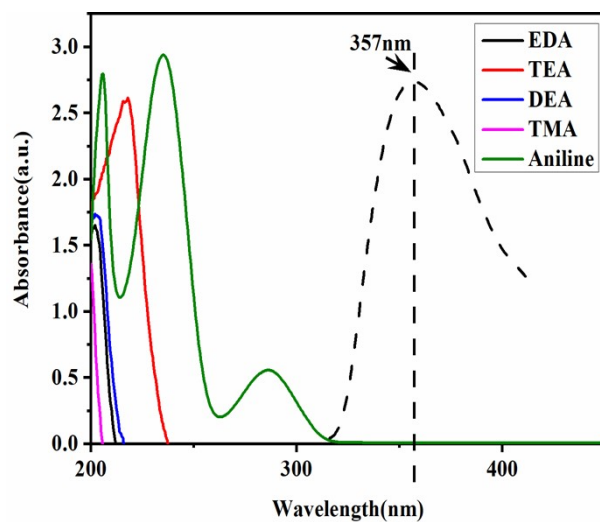

**Fig. S25** UV absorption spectra of different organic amines and excited spectrum of compound **1**.

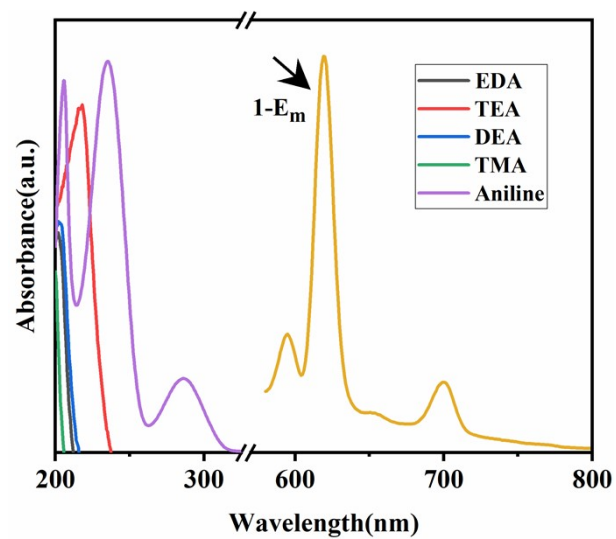

**Fig. S26** The absorbance spectra of organic amine ethanol solution and emission spectrum of compound **1**.

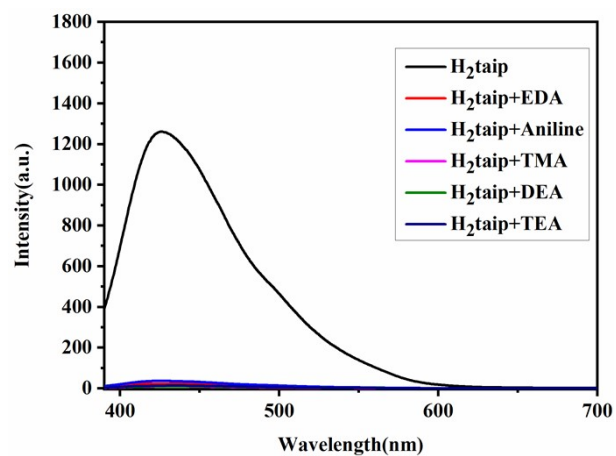

**Fig. S27** The fluorescence spectra of H<sub>2</sub>taip in ethanol and organic amines.

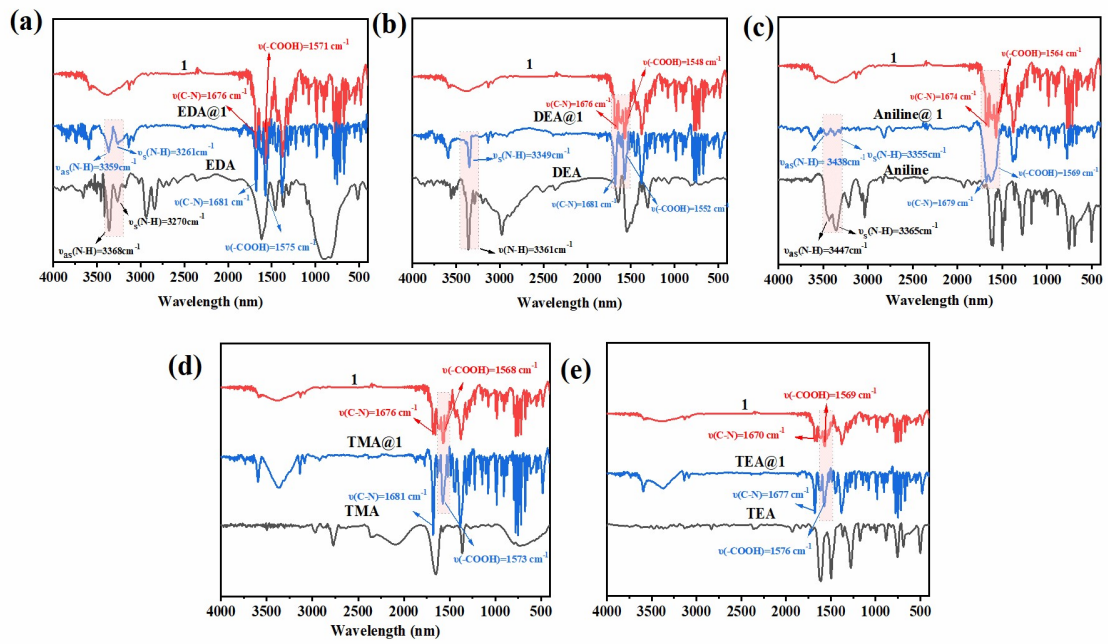

**Fig. S28** IR spectra of organic amines, compound 1 and compound 1 after sensing organic amines.

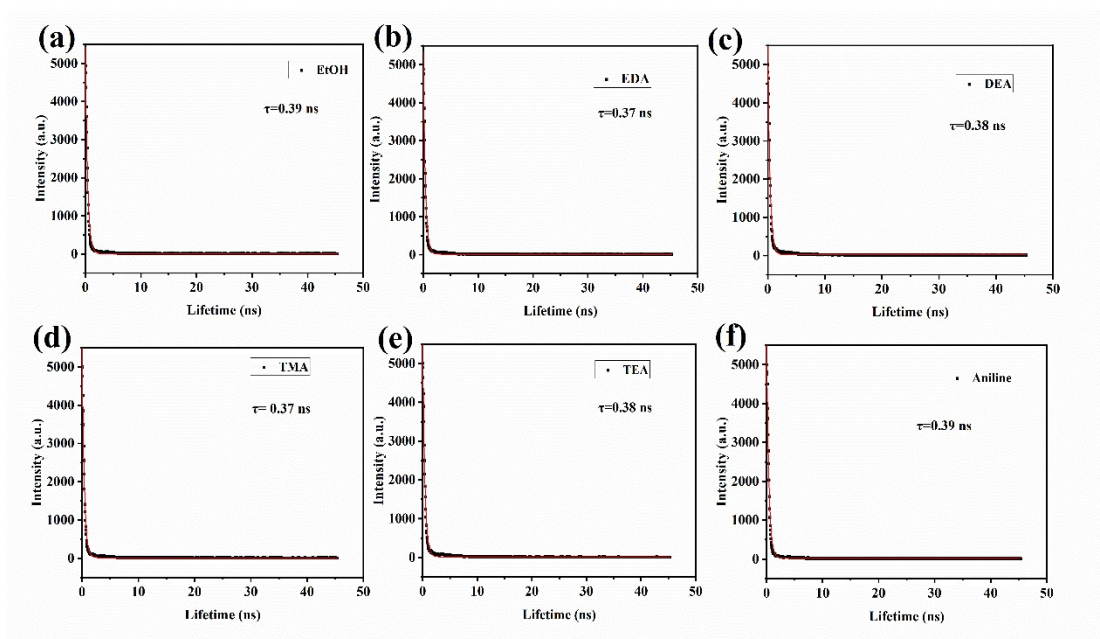

**Fig. S29** Luminescence decay curves of compound **1** (a) in EtOH, (b) in EDA, (c) in DEA, (d) in TMA, (e) in TEA, and (f) in aniline.



**Table S1** Selected bond lengths (Å) and angles (°) for **1**.

| <b>1</b>             |            |                      |            |
|----------------------|------------|----------------------|------------|
| O(9)-Eu(1)#1         | 2.428(3)   | O(4)-Eu(1)#8         | 2.485(3)   |
| O(7)-Eu(1)#2         | 2.339(3)   | O(4)-Eu(2)#9         | 2.590(3)   |
| O(8)-Eu(2)#3         | 2.350(3)   | O(3)-Eu(2)#9         | 2.461(3)   |
| Eu(1)-O(5)           | 2.331(3)   | Eu(2)-O(11)          | 2.435(2)   |
| Eu(1)-O(1)           | 2.332(3)   | Eu(2)-O(1W)          | 2.456(3)   |
| Eu(1)-O(7)#4         | 2.339(3)   | Eu(2)-O(3)#7         | 2.461(3)   |
| Eu(1)-O(11)          | 2.392(2)   | Eu(2)-O(4)#7         | 2.590(3)   |
| Eu(1)-O(10)          | 2.400(3)   | Eu(2)-O(8)#3         | 2.350(3)   |
| Eu(1)-O(9)#1         | 2.428(3)   | Eu(2)-O(11)#6        | 2.415(2)   |
| Eu(1)-O(4)#5         | 2.485(3)   | O(11)-Eu(2)#6        | 2.415(2)   |
| Eu(1)-O(2W)          | 2.525(3)   | Eu(2)-O(2)           | 2.362(3)   |
| Eu(2)-O(6)           | 2.395(3)   | O(2)-Eu(2)-O(4)#7    | 127.11(10) |
| O(5)-Eu(1)-O(1)      | 74.99(13)  | O(6)-Eu(2)-O(4)#7    | 149.63(10) |
| O(5)-Eu(1)-O(7)#4    | 143.46(12) | O(11)#6-Eu(2)-O(4)#7 | 70.17(8)   |
| O(1)-Eu(1)-O(7)#4    | 141.54(12) | O(11)-Eu(2)-O(4)#7   | 97.22(8)   |
| O(5)-Eu(1)-O(11)     | 79.57(11)  | O(1W)-Eu(2)-O(4)#7   | 71.28(11)  |
| O(1)-Eu(1)-O(11)     | 88.04(11)  | O(3)#7-Eu(2)-O(4)#7  | 51.24(8)   |
| O(7)#4-Eu(1)-O(11)   | 97.36(10)  | O(9)#1-Eu(1)-O(4)#5  | 139.49(10) |
| O(5)-Eu(1)-O(10)     | 77.09(12)  | O(5)-Eu(1)-O(2W)     | 134.24(12) |
| O(1)-Eu(1)-O(10)     | 101.70(13) | O(1)-Eu(1)-O(2W)     | 71.26(13)  |
| O(7)#4-Eu(1)-O(10)   | 91.59(12)  | O(7)#4-Eu(1)-O(2W)   | 75.17(11)  |
| O(11)-Eu(1)-O(10)    | 151.29(9)  | O(11)-Eu(1)-O(4)#5   | 72.40(9)   |
| O(5)-Eu(1)-O(9)#1    | 124.76(12) | O(10)-Eu(1)-O(4)#5   | 84.21(9)   |
| O(1)-Eu(1)-O(9)#1    | 73.35(11)  | O(11)-Eu(1)-O(2W)    | 69.41(9)   |
| O(7)#4-Eu(1)-O(9)#1  | 79.41(11)  | O(10)-Eu(1)-O(2W)    | 139.28(10) |
| O(11)-Eu(1)-O(9)#1   | 141.77(9)  | O(9)#1-Eu(1)-O(2W)   | 73.02(10)  |
| O(10)-Eu(1)-O(9)#1   | 66.69(9)   | O(4)#5-Eu(1)-O(2W)   | 126.15(10) |
| O(5)-Eu(1)-O(4)#5    | 70.73(11)  | O(7)#4-Eu(1)-O(4)#5  | 73.65(10)  |
| O(1)-Eu(1)-O(4)#5    | 142.92(11) | O(8)#3-Eu(2)-O(1W)   | 73.62(14)  |
| O(11)#6-Eu(2)-O(1W)  | 135.29(11) | O(2)-Eu(2)-O(1W)     | 72.59(12)  |
| O(2)-Eu(2)-O(6)      | 79.41(13)  | O(6)-Eu(2)-O(1W)     | 109.80(15) |
| O(8)#3-Eu(2)-O(11)#6 | 77.98(11)  | O(11)-Eu(2)-O(1W)    | 139.69(13) |
| O(8)#3-Eu(2)-O(2)    | 124.18(12) | O(8)#3-Eu(2)-O(3)#7  | 127.58(10) |
| O(8)#3-Eu(2)-O(6)    | 72.04(12)  | O(2)-Eu(2)-O(3)#7    | 82.42(11)  |
| O(6)-Eu(2)-O(11)#6   | 92.93(12)  | O(6)-Eu(2)-O(3)#7    | 159.10(11) |
| O(8)#3-Eu(2)-O(11)   | 144.02(11) | O(11)#6-Eu(2)-O(3)#7 | 98.18(9)   |
| O(2)-Eu(2)-O(11)     | 86.42(10)  | O(11)-Eu(2)-O(3)#7   | 69.29(9)   |

|                     |            |                     |           |
|---------------------|------------|---------------------|-----------|
| O(6)-Eu(2)-O(11)    | 99.20(11)  | O(1W)-Eu(2)-O(3)#7  | 74.01(13) |
| O(11)#6-Eu(2)-O(11) | 67.49(9)   | O(8)#3-Eu(2)-O(4)#7 | 79.67(10) |
| O(2)-Eu(2)-O(11)#6  | 151.40(10) |                     |           |

---

For compound **1**, #1  $-x+2, -y+2, -z+2$ ; #2  $x, y-1, z$ ; #3  $-x+1, -y+1, -z+2$ ; #4  $x, 1+y, z$ ; #5  $x, -y+3/2, z+1/2$ ; #6  $-x+1, -y+2, -z+2$ ; #7  $-x+1, y+1/2, -z+3/2$ ; #8  $x, -y+3/2, z-1/2$ ; #9  $-x+1, y-1/2, -z+3/2$ .

**Table S2** The three-dimensional dimensions of TEA, aniline, TMA, DEA and EDA.

| Organic amines                                                                      | Three-Dimensional Size (Å <sup>3</sup> ) |
|-------------------------------------------------------------------------------------|------------------------------------------|
| 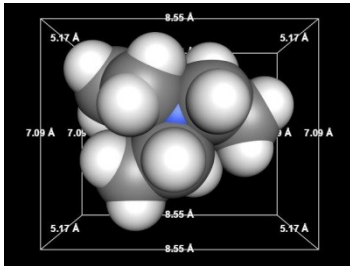   | <p><b>8.551×7.087×5.167</b></p>          |
|    | <p><b>7.923×6.497×3.203</b></p>          |
|   | <p><b>6.046×6.324×4.197</b></p>          |
|  | <p><b>8.826×4.448×4.030</b></p>          |
|  | <p><b>6.331×4.982×4.820</b></p>          |

**Table S3** HOMO and LUMO energy levels of H<sub>2</sub>taip and organic amines.

|                     | HOMO(H)  | LUMO(H)  | HOMO(eV) | LUMO(eV) | $\Delta E$ (eV) |
|---------------------|----------|----------|----------|----------|-----------------|
| H <sub>2</sub> taip | -0.26631 | -0.08411 | -7.25    | -2.29    | 4.96            |
| aniline             | -0.19871 | 0.00825  | -5.41    | 0.22     | 5.63            |
| EDA                 | -0.22661 | 0.08110  | -6.17    | 2.21     | 8.38            |
| TEA                 | -0.19880 | 0.07708  | -5.41    | 2.10     | 7.51            |
| TMA                 | -0.20715 | 0.08368  | -5.64    | 2.28     | 7.92            |
| DEA                 | -0.21517 | 0.08856  | -5.86    | 2.41     | 8.28            |
